# Supplementary material for: Development of a Healthy Dietary Habits Index for New Zealand Adults
Source: PubMed Central journal article supplement (PMC5452184; doi:10.3390/nu9050454), 2017-05-03
Supplement: nutrients-09-00454-s001.pdf [file nutrients-09-00454-s001.pdf]

## Supplementary

**Table S1.** Original questions in the Dietary Habits Questionnaire and scoring of the Healthy Dietary Habits Index (HDHI).

| Items                 | Description                                                                | Original Question(s) <sup>1</sup>                                                                                   | Scoring Criteria <sup>2</sup> |                          |                                   |                                     |                                         |
|-----------------------|----------------------------------------------------------------------------|---------------------------------------------------------------------------------------------------------------------|-------------------------------|--------------------------|-----------------------------------|-------------------------------------|-----------------------------------------|
|                       |                                                                            |                                                                                                                     | 0<br>(less healthy)           | 1                        | 2                                 | 3                                   | 4<br>(more healthy)                     |
| 1<br>(Red Meat)       | Trimming meat fat before consumption                                       | In the past four weeks, have you eaten red meat?                                                                    | Yes                           | Yes                      | Yes                               | Yes                                 | No                                      |
|                       |                                                                            | If yes, how often do you remove excess fat from meat?                                                               | Never                         | Rarely                   | Sometimes                         | Regularly                           | Always                                  |
| 2<br>(Chicken)        | Trimming chicken fat before consumption                                    | In the past four weeks, have you eaten chicken?                                                                     | Yes                           | Yes                      | Yes                               | Yes                                 | No                                      |
|                       |                                                                            | If yes, how often do you remove the skin from chicken?                                                              | Never                         | Rarely                   | Sometimes                         | Regularly                           | Always                                  |
| 3<br>(Fish/shellfish) | Proportion of fried fish/shellfish relative to total fish/shellfish intake | How often do you eat fresh or frozen fish or shellfish? Do not include battered / fried or canned fish or shellfish | Never consume fish/shellfish  | 100-76%                  | 75-51%                            | 26-50%                              | 0-25%                                   |
|                       |                                                                            | How often do you eat battered or fried fish or shellfish?                                                           |                               |                          |                                   |                                     |                                         |
|                       |                                                                            | How often do you eat canned fish or shellfish                                                                       |                               |                          |                                   |                                     |                                         |
| 4<br>(Milk)           | Types of milk consumed                                                     | What type of milk do you use the most of?                                                                           | None                          | Whole or standard milk   | Other (e.g. rice, goats milk)     | Reduced fat / Soy milk              | Skim or trim milk                       |
| 5<br>(Spread)         | Types of fat spread used                                                   | What type of butter or margarine spread do you use the most of?                                                     | Butter                        | Butter & margarine blend | Margarine <sup>3</sup> (full fat) | Plant sterol margarine <sup>4</sup> | None / Margarine (light or reduced fat) |

| Items                | Description                                     | Original Question(s) <sup>1</sup>                                                                                                       | Scoring Criteria <sup>2</sup> |                       |                |                                                   |                                    |
|----------------------|-------------------------------------------------|-----------------------------------------------------------------------------------------------------------------------------------------|-------------------------------|-----------------------|----------------|---------------------------------------------------|------------------------------------|
|                      |                                                 |                                                                                                                                         | 0<br>(less healthy)           | 1                     | 2              | 3                                                 | 4<br>(more healthy)                |
| 6<br>(Low-fat foods) | Use of low-fat products                         | How often do you choose low or reduced fat varieties of food instead of the standard variety?                                           | Never                         | Rarely                | Sometimes      | Regularly                                         | Always                             |
| 7<br>(Fries)         | Intake of potatoes and kumara fries per week    | How often do you eat hot chips, French fries, wedges, or kumara <sup>5</sup> chips?                                                     | 7 or more times/week          | 5-6 times/week        | 3-4 times/week | 1-2 times/week                                    | Never, <1/week                     |
| 8<br>(Bread)         | Types of bread consumed                         | On average, how many slices of bread/toast or bread rolls do you eat per day?<br>What type of bread, rolls or toast do you eat most of? | Don't eat bread               | White / Other         |                | Light grain <sup>6</sup> / High fiber white bread | Heavy grain bread <sup>7</sup>     |
| 9<br>(Fruit)         | Fruit intake per day                            | On average how many servings of fruit – fresh, frozen, canned or stewed - do you eat per day?                                           | Never                         | Less than one serving | 1 serving      |                                                   | 2 servings, 3 servings, 4 servings |
| 10<br>(Vegetables)   | Vegetables intake per day                       | On average how many servings of vegetables – fresh, frozen or canned – do you eat per day?                                              | Never                         | Less than one serving | 1 serving      | 2 servings                                        | 3 servings, 4 or more servings     |
| 11<br>(Soft drinks)  | Soft drink or energy drink consumption per week | How often do you drink soft drinks or energy drinks <sup>8</sup> ?                                                                      | 7 or more times/week          | 5-6 times/week        | 3-4 times/week | 1-2 times/week                                    | Never, <1/week                     |
| 12<br>(Breakfast)    | Breakfast consumption per week                  | How many days in an average week do you have something to eat for breakfast?                                                            | 0                             | 1-2                   | 3-4            | 5-6                                               | 7                                  |

| Items                   | Description                               | Original Question(s) <sup>1</sup>                                                                                                            | Scoring Criteria <sup>2</sup> |                |                |                |                     |
|-------------------------|-------------------------------------------|----------------------------------------------------------------------------------------------------------------------------------------------|-------------------------------|----------------|----------------|----------------|---------------------|
|                         |                                           |                                                                                                                                              | 0<br>(less healthy)           | 1              | 2              | 3              | 4<br>(more healthy) |
| 13<br>(Fast foods)      | Purchasing fast food or takeaways         | How often do you eat fast food or takeaways from places like McD, KFC, Burger King, Pizza shops or Fish 'n' Chip shops?                      | 7 or more times/week          | 5-6 times/week | 3-4 times/week | 1-2 times/week | Never, <1/week      |
| 14<br>(Added salt)      | Adding salt to foods before eating        | How often do you add salt to your food after it has been cooked or prepared?                                                                 | Always                        | Regularly      | Sometimes      | Rarely         | Never               |
| 15<br>(Low-salt foods)  | Use of low-salt products                  | How often do you choose low or reduced salt varieties of foods instead of standard variety?                                                  | Never                         | Rarely         | Sometimes      | Regularly      | Always              |
| (excluded) <sup>9</sup> | Fruit juice or drink consumption per week | How often do you drink fruit juices and drinks?                                                                                              | 7 or more times/week          | 5-6 times/week | 3-4 times/week | 1-2 times/week | Never, <1/week      |
| (excluded) <sup>9</sup> | Confectionery consumption per week        | How often do you eat lollies, sweets, chocolate and confectionery?                                                                           | 7 or more times/week          | 5-6 times/week | 3-4 times/week | 1-2 times/week | Never, <1/week      |
| (excluded) <sup>9</sup> | Processed meat intake per month           | In the past four weeks, have you eaten processed meat <sup>8</sup> ?<br>If yes, how often do you eat processed meat products <sup>10</sup> ? | 7 or more times               | 5-6 times      | 3-4 times      | 1-2 times      | <1 time, Never      |
| (excluded) <sup>9</sup> | Types of cooking fat used                 | What type of fat or oil do you use most often when cooking?                                                                                  | Lard / Dripping               | Butter         | Butter blend   | Margarine      | None / oil          |
| (excluded) <sup>9</sup> | Fruit juice or drink                      | How often do you drink fruit juices and drinks?                                                                                              | 7 or more times/week          | 5-6 times/week | 3-4 times/week | 1-2 times/week | Never,              |

| Items | Description          | Original Question(s) <sup>1</sup> | Scoring Criteria <sup>2</sup> |   |   |   |                     |
|-------|----------------------|-----------------------------------|-------------------------------|---|---|---|---------------------|
|       |                      |                                   | 0<br>(less healthy)           | 1 | 2 | 3 | 4<br>(more healthy) |
|       | consumption per week |                                   |                               |   |   |   | <1/week             |

<sup>1</sup> Original questions from the Dietary Habits Questionnaire.

<sup>2</sup> Scoring criteria based on responses from the Dietary Habits Questionnaire.

<sup>3</sup> Fat spread made from vegetable oils such as canola, sunflower and olive oils.

<sup>4</sup> Margarine spread containing phytosterols, including both full and low-fat varieties such as Proactive and Logicol.

<sup>5</sup> Sweet potatoes

<sup>6</sup> Including commercial brands such as Molenberg, Freya's, Ploughmans, and MacKenzie High Country.

<sup>7</sup> Including commercial brands such as Vogels and Burgen.

<sup>8</sup> Sugar-sweetened beverages excluding diet varieties.

<sup>9</sup> This item was not included in the final index.

<sup>10</sup> Including ham, bacon, sausages, luncheon, canned corned beef, pastrami and salami.
